# Supplementary material
Source: publisher figshare collection journal article supplement (https://karger.figshare.com/articles/dataset/_/5537545)

Supplemental Figure 1. Recruitment and participation outcomes by recruitment site

**Kaiser Permanente Northwest Biobank**

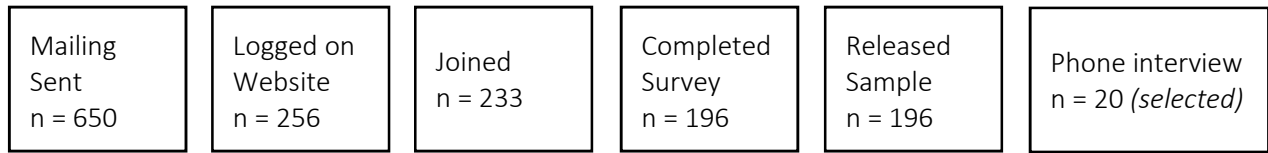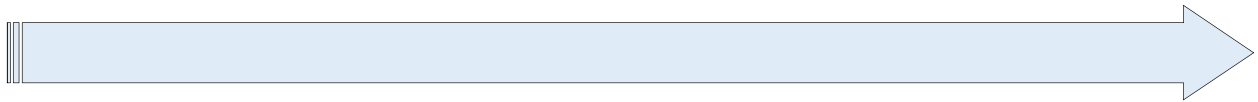

**UNC General Internal Medicine Clinic**

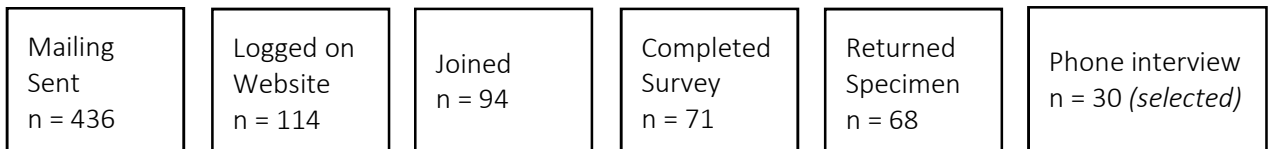

Supplement: Supplementary file 2 [file 1]
